# Supplementary figures and images for: Patterns of unexpected in-hospital deaths: a root cause analysis
Source: Springer Nature journal article supplement (doi:10.1186/1754-9493-5-3), 2011-01-01

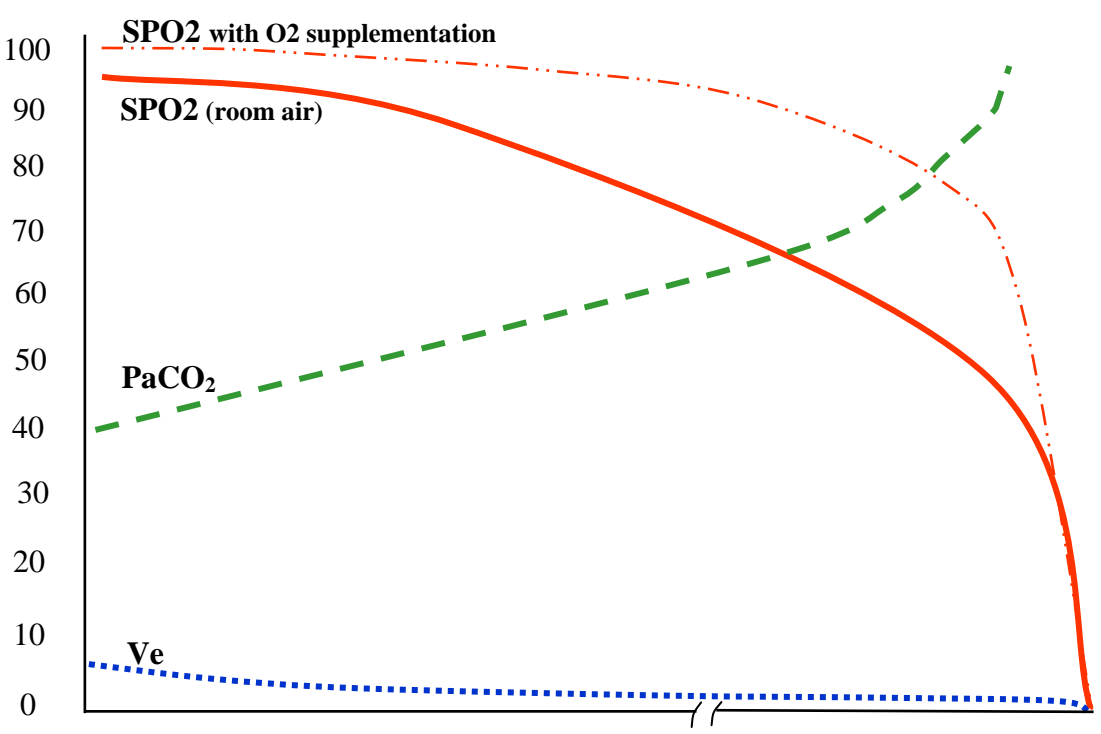

Supplement: 13037_2010_89_MOESM2_ESM.pdf [file 13037_2010_89_MOESM2_ESM.pdf]

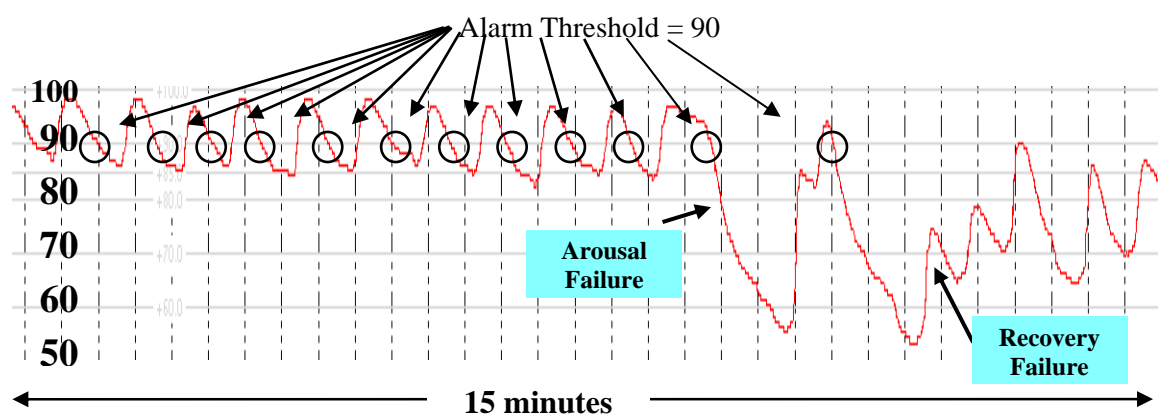

Supplement: 13037_2010_89_MOESM6_ESM.pdf [file 13037_2010_89_MOESM6_ESM.pdf]
